# Supplementary material for: Selective direct conversion of aqueous ethanol into butadiene via rational design of multifunctional catalysts
Source: Royal Society of Chemistry journal article supplement (doi:10.1039/d1cy02149d), 2022-01-01
Supplement: d1cy02149d1.pdf [file d1cy02149d1.pdf]

## Supplementary Information

Selectively Direct Conversion of Aqueous Ethanol into Butadiene via Rational

Design of Multifunctional Catalysts

Kangzhou Wang,<sup>a</sup> Xiaobo Peng,<sup>\*a,b</sup> Chengwei Wang,<sup>a</sup> Weizhe Gao,<sup>a</sup> Na Liu,<sup>c</sup> Xiaoyu Guo,<sup>a</sup>

Yingluo He,<sup>a</sup> Guohui Yang,<sup>a</sup> Lilong Jiang<sup>b</sup> and Noritatsu Tsubaki<sup>\*a</sup>

<sup>a</sup>Department of Applied Chemistry, School of Engineering, University of Toyama, Gofuku  
3190, Toyama 930-8555, Japan

<sup>b</sup>National Engineering Research Center of Chemical Fertilizer Catalyst, Fuzhou University,  
Fuzhou 350002, China

<sup>c</sup>School of Materials Science and Engineering, Central South University of Forestry and  
Technology, Changsha, Hunan 410004, China

**\*Corresponding authors:**

PENG.xiaobo@fzu.edu.cn (X. Peng)

tsubaki@eng.u-toyama.ac.jp (N. Tsubaki)

## 1. Catalyst preparation

### 1.1. Materials

Triblock copolymer Pluronic 123 (P123, Poly (ethylene glycol)-block-poly (propylene glycol)-block-poly (ethylene glycol); EO<sub>20</sub>PO<sub>70</sub>EO<sub>20</sub>) was purchased from the Sigma-Aldrich Co., LLC. Tetraethyl orthosilicate (TEOS, 98 %) was obtained from the Kanto Chemical Co., Inc. Hydrochloric acid (HCl, 35 %), cyclohexane (99.0 %), n-butanol (99.0 %), zinc nitrate hexahydrate (Zn(NO<sub>3</sub>)<sub>2</sub>·6H<sub>2</sub>O, 99.0 %), and zirconyl nitrate dihydrate (ZrO(NO<sub>3</sub>)<sub>2</sub>·2H<sub>2</sub>O, 97.0 %) were purchased from the Wako Pure Chemical Corporation.

### 1.2. Supports synthesis

MCF was synthesized according to a literature method.<sup>[1]</sup> Typically, Triblock copolymer Pluronic P123 of 2 g was dissolved in HCl solution (2.0 mol·L<sup>-1</sup>) of 70 mL under stirring for 2 h. After the P123 was completely dissolved under stirring, the cyclohexane of 2.4 g was added into mixture stirring 1 h, and then TEOS of 4.2 g was added to the homogeneous solution. This gel mixture was continuously stirred at 35 °C for 24 h and finally crystallized in a Teflon-lined autoclave at 100 °C for 24 h. After crystallization the solid product was centrifuged, washed with deionized water, dried at 60 °C overnight, and calcined at 550 °C in the air for 24 h to remove the organic template to obtain MCF support.

SBA-15 was prepared by hydrothermal synthesis, as reported by Choi et al.<sup>[2]</sup> Typically, P123 of 2 g, deionized water of 15 g, and HCl solution (2 mol·L<sup>-1</sup>) of 60 g were mixed in a beaker under stirring until the P123 completely dissolved. Then, TEOS of 4.25 g was added into the mixture. The mixture was kept stirring at 500 rpm for 24 h and transferred into a Teflon-lined autoclave for hydrothermal synthesis at 100 °C for 24 h. Then, the solid product in the autoclave was centrifuged at 2500 rpm, washed with deionized water, and dried at 60 °C for 12 h. Finally, the SBA-15 support was obtained after calcination in air at 550 °C for 24 h.

KIT-6 was synthesized by referring to the previously reported method.<sup>[3]</sup> In brief, Triblock copolymer Pluronic P123 of 2.0 g was dissolved in H<sub>2</sub>O of 72 g and 36 % HCl solution of 3.84 g under stirring at 35 °C for 1 h, and then n-butanol of 2 g was added and stirred for 1 h. Subsequently, TEOS of 4.3 g was added to the solution. The resulting mixture was stirred vigorously for 24 h at 35 °C, and this solution was placed in a Teflon-lined stainless steel autoclave and hydrothermally treated at 100 °C for 24 h. After crystallization the solid product was centrifuged, filtered, washed with deionized water, and dried in air at 60 °C, and calcined in static air at 550 °C for 24 h to decompose the template and obtained a powder KIT-6 support.

### 1.3. Catalyst preparation

The various catalysts were synthesized by incipient impregnation. In a typical process, Zn(NO<sub>3</sub>)<sub>2</sub>·6H<sub>2</sub>O of 0.15 g and ZrO(NO<sub>3</sub>)<sub>2</sub>·2H<sub>2</sub>O of 0.33 g were dissolved into water of 20mL under stirring to obtain a solution. The above-mentioned supports of MCF, SBA-15, KIT-6, or Si-beta of 1.50 g were added into this solution under stirring for 6 h and then heated at 100 °C to remove the water. After the resultant solid was calcined at 500 °C in static air for 5 h with a temperature ramp of 2 °·min<sup>-1</sup>, the as-prepared samples were denoted as Zn<sub>0.02</sub>Zr<sub>0.05</sub>/MCF, Zn<sub>0.02</sub>Zr<sub>0.05</sub>/SBA-15, and Zn<sub>0.02</sub>Zr<sub>0.05</sub>/KIT-6 catalysts.

Zn<sub>0.02</sub>Zr<sub>0.05</sub>/Si-beta-di was prepared by the dry impregnation method. Si-beta powder of 1.0 g was finely ground with an appropriate amount of decomposable Zn(NO<sub>3</sub>)<sub>2</sub>·6H<sub>2</sub>O and ZrO(NO<sub>3</sub>)<sub>2</sub>·2H<sub>2</sub>O and calcined at 500 °C in the air for 6 h. The final product was labeled as Zn<sub>0.02</sub>Zr<sub>0.05</sub>/Si-beta-di.

To investigate impregnation sequences, we reversed the order for impregnation of Zn(NO<sub>3</sub>)<sub>2</sub>·6H<sub>2</sub>O and ZrO(NO<sub>3</sub>)<sub>2</sub>·2H<sub>2</sub>O during the synthesis. Zn<sub>0.02</sub>/Zr<sub>0.05</sub>/Si-beta was prepared by two-step incipient impregnation. In brief, ZrO(NO<sub>3</sub>)<sub>2</sub>·2H<sub>2</sub>O of 0.13 g was dissolved into water of 20 mL under stirring to obtain a solution. The Si-beta of 1.50 g was added into this

solution under stirring for 6 h and then heated at 100 °C to remove the water. After the resultant solid was calcined at 500 °C in air for 5 h and obtained  $Zr_{0.05}/Si$ -beta sample. Then,  $Zn(NO_3)_2 \cdot 6H_2O$  of 0.15 g was dissolved into water of 20 mL under stirring to obtain a solution. The above-mentioned  $Zr_{0.05}/Si$ -beta was added into this solution under stirring and then heated at 100 °C to remove the water. After the resultant solid was calcined at 500 °C in the air for 5 h, and the resulting sample was denoted as  $Zn_{0.02}/Zr_{0.05}/Si$ -beta.

$Zr_{0.05}/Zn_{0.02}/Si$ -beta was also prepared by two-step incipient impregnation with the similar procedure and load amounts mentioned above in  $Zn_{0.02}/Zr_{0.05}/Si$ -beta catalyst, except for different impregnation sequences. The resulting sample was denoted as  $Zr_{0.05}/Zn_{0.02}/Si$ -beta.

## 2. Supplementary Figures and Tables

**Table S1.** Catalytic performance of various support catalysts in the direct AETB conversion.

| Catalysts                                      | EtOH<br>conv.<br>(%) | Selectivity (%) |                  |      |     |        | BD<br>yield<br>(%) |
|------------------------------------------------|----------------------|-----------------|------------------|------|-----|--------|--------------------|
|                                                |                      | BD              | C <sub>2</sub> = | AcH  | DEE | Others |                    |
| Zn <sub>0.02</sub> Zr <sub>0.05</sub> /MCF     | 80.8                 | 37.3            | 37.8             | 12.0 | 8.1 | 4.8    | 30.1               |
| Zn <sub>0.02</sub> Zr <sub>0.05</sub> /SBA-15  | 71.6                 | 37.9            | 30.7             | 16.4 | 9.2 | 5.8    | 27.1               |
| Zn <sub>0.02</sub> Zr <sub>0.05</sub> /KIT-6   | 77.1                 | 37.1            | 35.5             | 13.2 | 8.6 | 5.6    | 28.6               |
| Zn <sub>0.02</sub> Zr <sub>0.05</sub> /Si-beta | 75.8                 | 45.6            | 11.9             | 21.6 | 5.9 | 15.0   | 34.6               |

Reaction conditions: aqueous ethanol, catalyst = 0.2 g, T = 350 °C, WHSV = 1.0 h<sup>-1</sup>, and TOS = 5 h. The ethanol, butadiene, ethylene, acetaldehyde, and diethyl ether were abbreviated as EtOH, BD, C<sub>2</sub>=, AcH, and DEE, respectively.

**Table S2.** Effect of ethanol concentration on the catalytic performance of direct AETB conversion over  $Zn_{0.02}Zr_{0.05}/KIT-6$  catalyst.

| Ethanol concentration | EtOH conv. (%) | Selectivity (%) |         |      |      |        | BD yield (%) |
|-----------------------|----------------|-----------------|---------|------|------|--------|--------------|
|                       |                | BD              | $C_2^=$ | AcH  | DEE  | Others |              |
| 95 %                  | 91.2           | 53.5            | 15.5    | 6.4  | 13.2 | 11.4   | 48.8         |
| 80 %                  | 77.1           | 37.1            | 35.5    | 13.2 | 8.6  | 5.6    | 28.6         |

Reaction conditions: aqueous ethanol, catalyst = 0.2 g, T = 350 °C, WHSV = 1.0 h<sup>-1</sup>, and TOS = 5 h. The ethanol, butadiene, ethylene, acetaldehyde, and diethyl ether were abbreviated as EtOH, BD,  $C_2^=$ , AcH, and DEE, respectively.

**Table S3.** Catalytic performance of various synthesis methods in the direct AETB conversion.

| Catalysts                                         | EtOH<br>conv. (%) | Selectivity (%) |                  |      |     |        | BD<br>yield<br>(%) |
|---------------------------------------------------|-------------------|-----------------|------------------|------|-----|--------|--------------------|
|                                                   |                   | BD              | C <sub>2</sub> = | AcH  | DEE | Others |                    |
| Zn <sub>0.02</sub> Zr <sub>0.05</sub> /Si-beta    | 75.8              | 45.6            | 11.9             | 21.6 | 5.9 | 15.0   | 34.6               |
| Zn <sub>0.02</sub> Zr <sub>0.05</sub> /Si-beta-di | 61.6              | 37.7            | 15.2             | 30.2 | 6.8 | 10.1   | 23.2               |
| Zn <sub>0.02</sub> /Zr <sub>0.05</sub> /Si-beta   | 68.1              | 40.3            | 11.6             | 31.1 | 6.8 | 10.2   | 27.4               |
| Zr <sub>0.05</sub> /Zn <sub>0.02</sub> /Si-beta   | 63.7              | 38.9            | 10.3             | 33.2 | 6.2 | 11.4   | 24.8               |

Reaction conditions: aqueous ethanol, catalyst = 0.2 g, T = 350 °C, WHSV = 1.0 h<sup>-1</sup>, and TOS = 5 h. The ethanol, butadiene, ethylene, acetaldehyde, and diethyl ether were abbreviated as EtOH, BD, C<sub>2</sub>=, AcH, and DEE, respectively.

**Table S4.** Catalytic performance of various Zn/Si molar ratio catalysts in the direct AETB reaction.

| Catalysts                                       | EtOH<br>conv. (%) | Selectivity (%) |                             |      |      |        | BD<br>yield<br>(%) |
|-------------------------------------------------|-------------------|-----------------|-----------------------------|------|------|--------|--------------------|
|                                                 |                   | BD              | C <sub>2</sub> <sup>=</sup> | AcH  | DEE  | Others |                    |
| Zn <sub>0.005</sub> Zr <sub>0.05</sub> /Si-beta | 61.8              | 40.0            | 18.1                        | 18.6 | 18.6 | 4.7    | 24.7               |
| Zn <sub>0.01</sub> Zr <sub>0.05</sub> /Si-beta  | 72.8              | 42.3            | 15.4                        | 20.1 | 11.7 | 10.5   | 30.8               |
| Zn <sub>0.02</sub> Zr <sub>0.05</sub> /Si-beta  | 75.8              | 45.6            | 11.9                        | 21.6 | 5.9  | 15.0   | 34.6               |
| Zn <sub>0.03</sub> Zr <sub>0.05</sub> /Si-beta  | 79.8              | 43.8            | 9.0                         | 24.3 | 4.3  | 18.6   | 35.0               |
| Zn <sub>0.04</sub> Zr <sub>0.05</sub> /Si-beta  | 82.6              | 40.7            | 7.5                         | 26.2 | 3.2  | 22.4   | 33.6               |

Reaction conditions: aqueous ethanol, catalyst = 0.2 g, T = 350 °C, WHSV = 1.0 h<sup>-1</sup>, and TOS = 5 h. The ethanol, butadiene, ethylene, acetaldehyde, and diethyl ether were abbreviated as EtOH, BD, C<sub>2</sub><sup>=</sup>, AcH, and DEE, respectively.



**Table S5.** Catalytic performance of various Zr/Si molar ratio catalysts in the direct AETB reaction.

| Catalysts                                       | EtOH conv. (%) | Selectivity (%) |                  |      |     |        | BD yield (%) |
|-------------------------------------------------|----------------|-----------------|------------------|------|-----|--------|--------------|
|                                                 |                | BD              | C <sub>2</sub> = | AcH  | DEE | Others |              |
| Zn <sub>0.02</sub> Zr <sub>0.005</sub> /Si-beta | 65.5           | 35.4            | 7.3              | 35.1 | 1.7 | 20.5   | 23.2         |
| Zn <sub>0.02</sub> Zr <sub>0.02</sub> /Si-beta  | 70.7           | 48.1            | 9.8              | 23.2 | 2.1 | 16.8   | 34.0         |
| Zn <sub>0.02</sub> Zr <sub>0.05</sub> /Si-beta  | 75.8           | 45.6            | 11.9             | 21.6 | 5.9 | 15.0   | 34.6         |
| Zn <sub>0.02</sub> Zr <sub>0.08</sub> /Si-beta  | 77.4           | 37.8            | 18.2             | 20.1 | 9.1 | 14.8   | 29.3         |

Reaction conditions: aqueous ethanol, catalyst = 0.2 g, T = 350 °C, WHSV = 1.0 h<sup>-1</sup>, and TOS = 5 h. The ethanol, butadiene, ethylene, acetaldehyde, and diethyl ether were abbreviated as EtOH, BD, C<sub>2</sub>=, AcH, and DEE, respectively.

**Table S6.** Effect of various promoters on catalytic performance in the direct AETB reaction.

| Catalysts                                         | EtOH conv. (%) | Selectivity (%) |                  |      |      |        | BD yield (%) |
|---------------------------------------------------|----------------|-----------------|------------------|------|------|--------|--------------|
|                                                   |                | BD              | C <sub>2</sub> = | AcH  | DEE  | Others |              |
| Ga-Zn <sub>0.02</sub> Zr <sub>0.02</sub> /Si-beta | 98.1           | 5.5             | 65.6             | 9.4  | 0.0  | 19.5   | 5.4          |
| Mg-Zn <sub>0.02</sub> Zr <sub>0.02</sub> /Si-beta | 49.2           | 35.4            | 17.8             | 26.0 | 15.4 | 5.4    | 17.5         |
| In-Zn <sub>0.02</sub> Zr <sub>0.02</sub> /Si-beta | 53.3           | 38.2            | 6.2              | 41.6 | 7.6  | 6.4    | 20.4         |
| Ce-Zn <sub>0.02</sub> Zr <sub>0.02</sub> /Si-beta | 79.6           | 52.9            | 8.1              | 20.0 | 2.6  | 16.4   | 42.1         |
| La-Zn <sub>0.02</sub> Zr <sub>0.02</sub> /Si-beta | 76.1           | 58.3            | 6.6              | 18.2 | 2.7  | 14.2   | 44.4         |
| Y-Zn <sub>0.02</sub> Zr <sub>0.02</sub> /Si-beta  | 80.2           | 60.4            | 7.7              | 13.1 | 2.4  | 16.4   | 48.4         |

Reaction conditions: aqueous ethanol, catalyst = 0.2 g, T = 350 °C, WHSV = 1.0 h<sup>-1</sup>, and TOS = 5 h. The ethanol, butadiene, ethylene, acetaldehyde, and diethyl ether were abbreviated as EtOH, BD, C<sub>2</sub>=, AcH, and DEE, respectively.

**Table S7.** Comparison the catalytic performance of the catalyst with the same mole of Y and La promoter.

| Catalysts                                            | EtOH conv. (%) | Selectivity (%) |                             |      |     |        | BD yield (%) |
|------------------------------------------------------|----------------|-----------------|-----------------------------|------|-----|--------|--------------|
|                                                      |                | BD              | C <sub>2</sub> <sup>=</sup> | AcH  | DEE | Others |              |
| 3%La-Zn <sub>0.02</sub> Zr <sub>0.02</sub> /Si-beta  | 76.1           | 58.3            | 6.6                         | 18.2 | 2.7 | 14.2   | 44.4         |
| 1.9%Y-Zn <sub>0.02</sub> Zr <sub>0.02</sub> /Si-beta | 78.1           | 59.2            | 7.8                         | 14.5 | 2.4 | 16.1   | 46.2         |

Reaction conditions: aqueous ethanol, catalyst = 0.2 g, T = 350 °C, WHSV = 1.0 h<sup>-1</sup>, and TOS = 5 h. The ethanol, butadiene, ethylene, acetaldehyde, and diethyl ether were abbreviated as EtOH, BD, C<sub>2</sub><sup>=</sup>, AcH, and DEE, respectively.

**Table S8.** Comparison of the catalytic performance obtained in this work with reported literatures.<sup>a</sup>

| Catalysts                                        | WHSV<br>(h <sup>-1</sup> ) | Temp.<br>(°C) | EtOH<br>conv.<br>(%) | BD sel.<br>(%) | BD<br>yield<br>(%) | Ref.      |
|--------------------------------------------------|----------------------------|---------------|----------------------|----------------|--------------------|-----------|
| ZnO-N/ZrO <sub>2</sub> -SiO <sub>2</sub>         | 2.6                        | 375           | 50.4                 | 56.9           | 28.7               | 4         |
| ZnLa-ZrSiBEA                                     | 2.8                        | 380           | 31.1                 | 61.7           | 19.2               | 5         |
| ZnO/MgO-SiO <sub>2</sub>                         | 1.0                        | 425           | 44.8                 | 56.2           | 25.2               | 6         |
| Y-Zn <sub>0.02</sub> Zr <sub>0.02</sub> /Si-beta | 1.0                        | 350           | 80.2                 | 60.4           | 48.4               | This work |

<sup>a</sup>80 % aqueous ethanol.

**Table S9.** Effect of the reaction temperature on catalytic performance for the direct AETB conversion over Y-Zn<sub>0.02</sub>Zr<sub>0.02</sub>/Si-beta catalyst.

| Temperature (°C) | EtOH conv. (%) | Selectivity (%) |                             |      |      |        | BD yield (%) |
|------------------|----------------|-----------------|-----------------------------|------|------|--------|--------------|
|                  |                | BD              | C <sub>2</sub> <sup>=</sup> | AcH  | DEE  | Others |              |
| 300              | 25.6           | 54.9            | 5.1                         | 17.2 | 13.2 | 9.6    | 14.1         |
| 325              | 59.9           | 57.3            | 7.4                         | 14.8 | 8.8  | 11.7   | 34.3         |
| 350              | 80.2           | 60.4            | 7.7                         | 13.1 | 2.4  | 16.4   | 48.4         |
| 375              | 97.9           | 44.9            | 9.4                         | 8.8  | 1.6  | 35.3   | 44.0         |
| 400              | 98.7           | 38.4            | 9.9                         | 8.1  | 1.0  | 42.6   | 37.9         |

Reaction conditions: aqueous ethanol, catalyst = 0.2 g, WHSV = 1.0 h<sup>-1</sup>, and TOS = 5 h. The ethanol, butadiene, ethylene, acetaldehyde, and diethyl ether were abbreviated as EtOH, BD, C<sub>2</sub><sup>=</sup>, AcH, and DEE, respectively.

**Table S10.** Effect of the WHSV on catalytic performance for the direct AETB conversion over Y-Zn<sub>0.02</sub>Zr<sub>0.02</sub>/Si-beta catalyst.

| WHSV (h <sup>-1</sup> ) | EtOH conv. (%) | Selectivity (%) |                  |      |     |        | BD yield (%) |
|-------------------------|----------------|-----------------|------------------|------|-----|--------|--------------|
|                         |                | BD              | C <sub>2</sub> = | AcH  | DEE | Others |              |
| 0.5                     | 95.8           | 41.3            | 10.8             | 5.1  | 1.2 | 41.6   | 39.6         |
| 0.7                     | 89.7           | 48.5            | 9.2              | 9.1  | 1.4 | 31.8   | 43.5         |
| 1.0                     | 80.2           | 60.4            | 7.7              | 13.1 | 2.4 | 16.4   | 48.4         |
| 1.2                     | 76.7           | 53.6            | 7.9              | 19.4 | 3.9 | 15.2   | 41.1         |
| 1.4                     | 72.5           | 50.8            | 6.1              | 23.2 | 5.2 | 14.7   | 36.8         |
| 2.4                     | 63.8           | 46.3            | 5.1              | 28.9 | 7.3 | 12.4   | 29.5         |

Reaction conditions: aqueous ethanol, catalyst = 0.2 g, T = 350 °C, and TOS = 5 h. The ethanol, butadiene, ethylene, acetaldehyde, and diethyl ether were abbreviated as EtOH, BD, C<sub>2</sub>=, AcH, and DEE, respectively.

**Table S11.** The elemental composition of the synthesized catalysts.

| Sample                                           | Experimental value (wt%) <sup>a</sup> |     |      |     | Theoretical value (wt%) <sup>b</sup> |     |      |     |
|--------------------------------------------------|---------------------------------------|-----|------|-----|--------------------------------------|-----|------|-----|
|                                                  | Zn                                    | Zr  | Si   | Y   | Zn                                   | Zr  | Si   | Y   |
| Zn <sub>0.02</sub> /Si-beta                      | 4.4                                   | /   | 95.6 | /   | 4.5                                  | /   | 95.4 | /   |
| Zr <sub>0.02</sub> /Si-beta                      | /                                     | 6.0 | 94.0 | /   | /                                    | 6.3 | 93.7 | /   |
| Zn <sub>0.02</sub> Zr <sub>0.02</sub> /Si-beta   | 4.2                                   | 5.8 | 90.0 | /   | 4.3                                  | 6.0 | 89.7 | /   |
| Y-Zn <sub>0.02</sub> Zr <sub>0.02</sub> /Si-beta | 4.1                                   | 5.7 | 87.2 | 3.0 | 4.0                                  | 5.5 | 87.1 | 3.4 |

<sup>a</sup>The elemental composition of these catalysts was obtained by EDX analysis; <sup>b</sup>The dosages of the elements were calculated according to the amount of raw materials in the catalyst preparation.

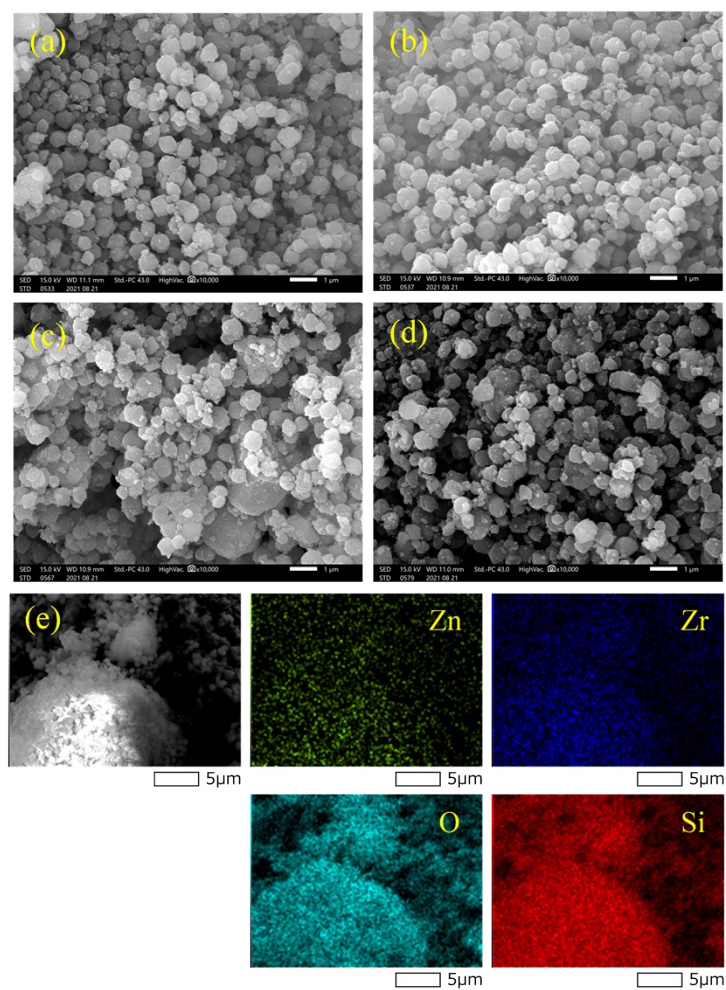

**Fig. S1.** SEM and EDX elemental mapping images of the synthesized catalysts. (a)  $Zn_{0.02}/Si$ -beta, (b)  $Zr_{0.02}/Si$ -beta, (c)  $Zn_{0.02}Zr_{0.02}/Si$ -beta, (d)  $Y-Zn_{0.02}Zr_{0.02}/Si$ -beta, and (e) EDX elemental mapping images of the  $Zn_{0.02}Zr_{0.02}/Si$ -beta catalyst.



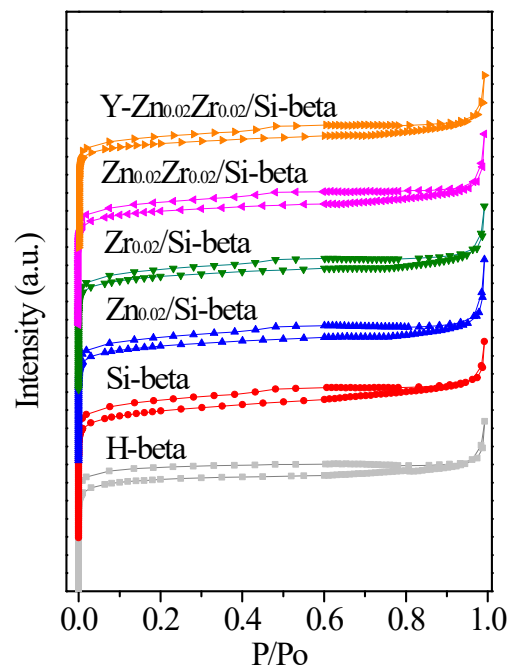

**Fig. S2.** Nitrogen adsorption and desorption isotherms of the H-beta, Si-beta, and synthesized catalysts.

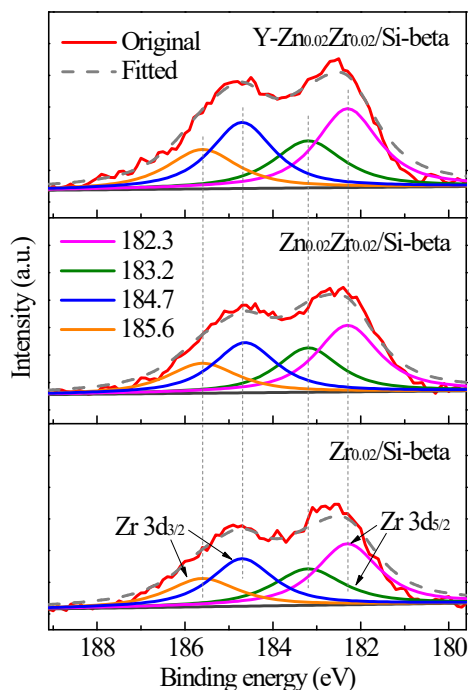

**Fig. S3.** Deconvolution of Zr 3d region for the  $\text{Zr}_{0.02}/\text{Si-beta}$ ,  $\text{Zn}_{0.02}\text{Zr}_{0.02}/\text{Si-beta}$ , and  $\text{Y-Zn}_{0.02}\text{Zr}_{0.02}/\text{Si-beta}$  catalysts. The peaks are fitted to two contributions from  $\text{ZrO}_2$  and  $\text{Zr-OH}$ . The Zr 3d doublet peaks from  $\text{ZrO}_2$  has binding energy at 184.7 and 182.3 eV with an energy separation of 2.4 eV, corresponding to contributions from Zr  $3d_{3/2}$  and Zr  $3d_{5/2}$ , respectively. Meanwhile, the area ratio of the two spin orbit peaks ( $\text{Zr}d_{3/2}$ -to- $\text{Zr}d_{5/2}$ ) is 2:3. The full width at half maximum (FWHM) is 1.7 eV for both peaks. The Zr 3d doublet peaks from  $\text{Zr-OH}$  has binding energy at 185.6 and 183.2 eV, which are assigned to contributions from Zr  $3d_{3/2}$  and Zr  $3d_{5/2}$ , respectively. Two spin orbit peaks are separated by an energy separation of 2.4 eV and the  $\text{Zr}d_{3/2}$ -to- $\text{Zr}d_{5/2}$  area ratio of 2:3. The FWHM is 1.9 eV for both peaks. These results are in agreement with the reported value in literatures.<sup>[7-9]</sup>

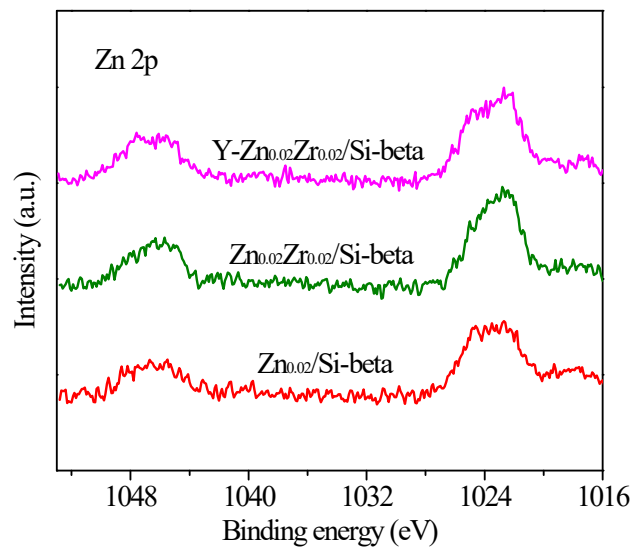

**Fig. S4.** Zn 2p region for the Zn<sub>0.02</sub>/Si-beta, Zn<sub>0.02</sub>Zr<sub>0.02</sub>/Si-beta, and Y-Zn<sub>0.02</sub>Zr<sub>0.02</sub>/Si-beta catalysts.

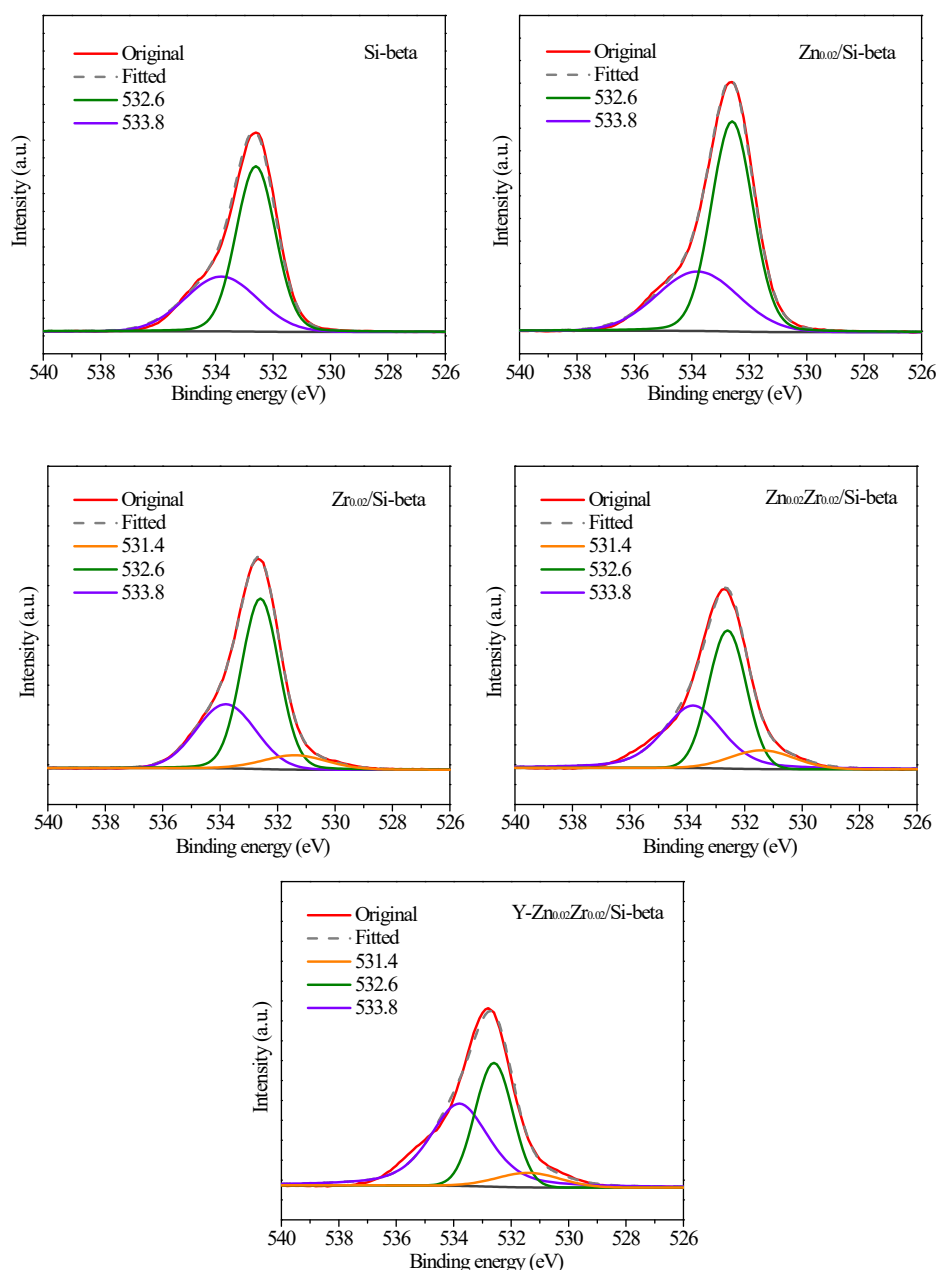

**Fig. S5.** Deconvolution of O 1s region for the Si-beta,  $\text{Zn}_{0.02}/\text{Si-beta}$ ,  $\text{Zr}_{0.02}/\text{Si-beta}$ ,  $\text{Zn}_{0.02}\text{Zr}_{0.02}/\text{Si-beta}$ , and  $\text{Y-Zn}_{0.02}\text{Zr}_{0.02}/\text{Si-beta}$  catalysts. Over Si-beta, Si-OH is located at 533.8 eV with FWHM of 3.0 eV, and Si-O-Si is centered at 532.6 eV with FWHM of 1.6 eV. Over  $\text{Zn}_{0.02}/\text{Si-beta}$ , the FWHM of the O 1s peaks at 533.8 and 532.6 eV are 3.3 and 1.7 eV, respectively. Meanwhile, the O 1s peaks at 533.8 and 532.6 eV in  $\text{Zr}_{0.02}/\text{Si-beta}$ ,  $\text{Zn}_{0.02}\text{Zr}_{0.02}/\text{Si-beta}$ , and  $\text{Y-Zn}_{0.02}\text{Zr}_{0.02}/\text{Si-beta}$  catalysts have FWHM of 1.5 and 2.2 eV, and Zr-OH is found at 531.4 eV with FWHM of 2.6 eV. These are in agreement with the data reported in the literature.<sup>[9,10]</sup>

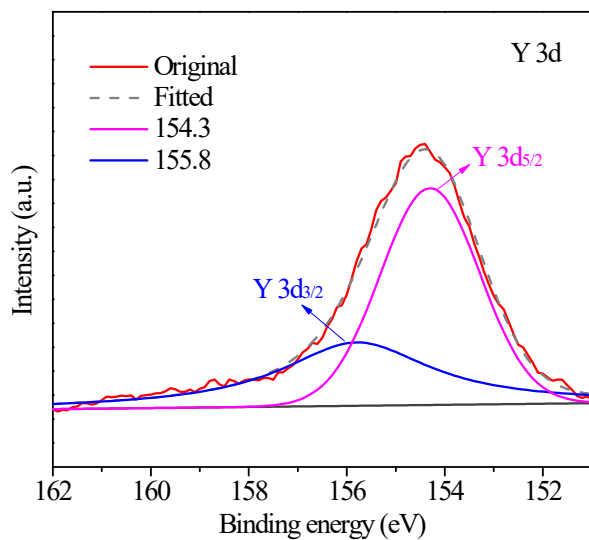

**Fig. S6.** Y 3d XPS region for the Y-Zn<sub>0.02</sub>Zr<sub>0.02</sub>/Si-beta catalysts. The Y 3d doublet peaks at 155.8 and 154.3 eV with an energy separation of 1.5 eV, which are attributed to the Y 3d<sub>3/2</sub> and Y 3d<sub>5/2</sub>, respectively. The spin-orbit doublet peaks were fitted with a fixed Yd<sub>3/2</sub>-to-Yd<sub>5/2</sub> area ratio of 2:3 and the FWHM of 3.5 and 2.4 eV, respectively. The results are consistent with the reported value in the literature.<sup>[11]</sup>

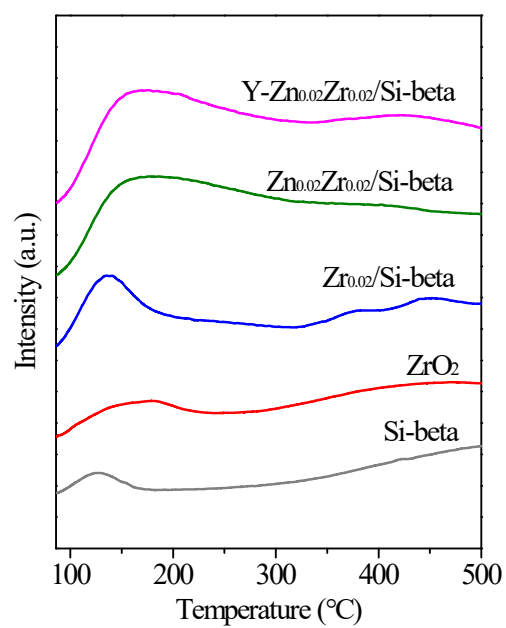

**Fig. S7.** NH<sub>3</sub>-TPD profiles of the Si-beta, ZrO<sub>2</sub>, Zr<sub>0.02</sub>/Si-beta, Zn<sub>0.02</sub>Zr<sub>0.02</sub>/Si-beta, and Y-Zn<sub>0.02</sub>Zr<sub>0.02</sub>/Si-beta catalysts.

**Table S12.** The catalytic performance of the direct AETB conversion over Y-supported Zn<sub>0.02</sub>Zr<sub>0.02</sub>/Si-beta catalyst with different Y loading amounts.

| Y amounts | EtOH conv. (%) | Selectivity (%) |                  |      |     |        | BD yield (%) |
|-----------|----------------|-----------------|------------------|------|-----|--------|--------------|
|           |                | BD              | C <sub>2</sub> = | AcH  | DEE | Others |              |
| 0%        | 70.7           | 48.1            | 9.8              | 23.2 | 2.1 | 16.8   | 34.0         |
| 1%        | 73.6           | 52.1            | 8.1              | 20.0 | 2.4 | 17.4   | 38.3         |
| 3%        | 80.2           | 60.4            | 7.7              | 13.1 | 2.4 | 16.4   | 48.4         |
| 5%        | 86.3           | 53.3            | 7.5              | 10.4 | 2.5 | 26.3   | 46.0         |
| 7%        | 88.5           | 48.9            | 7.2              | 9.5  | 2.1 | 32.3   | 43.3         |

Reaction conditions: aqueous ethanol, catalyst = 0.2 g, WHSV = 1.0 h<sup>-1</sup>, and TOS = 5 h. The ethanol, butadiene, ethylene, acetaldehyde, and diethyl ether were abbreviated as EtOH, BD, C<sub>2</sub>=, AcH, and DEE, respectively.

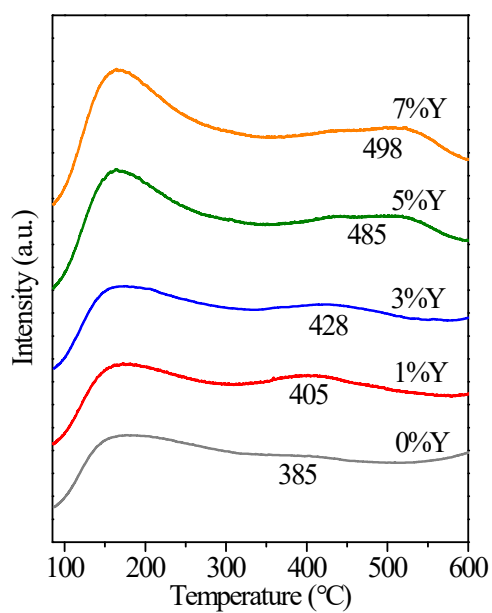

**Fig. S8.** NH<sub>3</sub>-TPD profiles of the Y-supported Zn<sub>0.02</sub>Zr<sub>0.02</sub>/Si-beta catalysts with different Y loading amounts. (0%Y-Zn<sub>0.02</sub>Zr<sub>0.02</sub>/Si-beta, 1%Y-Zn<sub>0.02</sub>Zr<sub>0.02</sub>/Si-beta, 3%Y-Zn<sub>0.02</sub>Zr<sub>0.02</sub>/Si-beta, 5%Y-Zn<sub>0.02</sub>Zr<sub>0.02</sub>/Si-beta, and 7%Y-Zn<sub>0.02</sub>Zr<sub>0.02</sub>/Si-beta).



**Table S13.** The acid amounts of the catalysts with different Y loading amounts.

| Catalysts                                          | Acid amounts (mmol·g <sup>-1</sup> ) <sup>a</sup> |        |       |               |             |
|----------------------------------------------------|---------------------------------------------------|--------|-------|---------------|-------------|
|                                                    | Weak                                              | Strong | Total | Strong /Total | Weak /Total |
| 0%Y-Zn <sub>0.02</sub> Zr <sub>0.02</sub> /Si-beta | 0.11                                              | 0.01   | 0.12  | 0.08          | 0.91        |
| 1%Y-Zn <sub>0.02</sub> Zr <sub>0.02</sub> /Si-beta | 0.11                                              | 0.02   | 0.13  | 0.15          | 0.87        |
| 3%Y-Zn <sub>0.02</sub> Zr <sub>0.02</sub> /Si-beta | 0.13                                              | 0.02   | 0.15  | 0.13          | 0.85        |
| 5%Y-Zn <sub>0.02</sub> Zr <sub>0.02</sub> /Si-beta | 0.17                                              | 0.09   | 0.26  | 0.34          | 0.65        |
| 7%Y-Zn <sub>0.02</sub> Zr <sub>0.02</sub> /Si-beta | 0.19                                              | 0.13   | 0.32  | 0.40          | 0.59        |

<sup>a</sup>Acid amount was obtained via NH<sub>3</sub>-TPD.

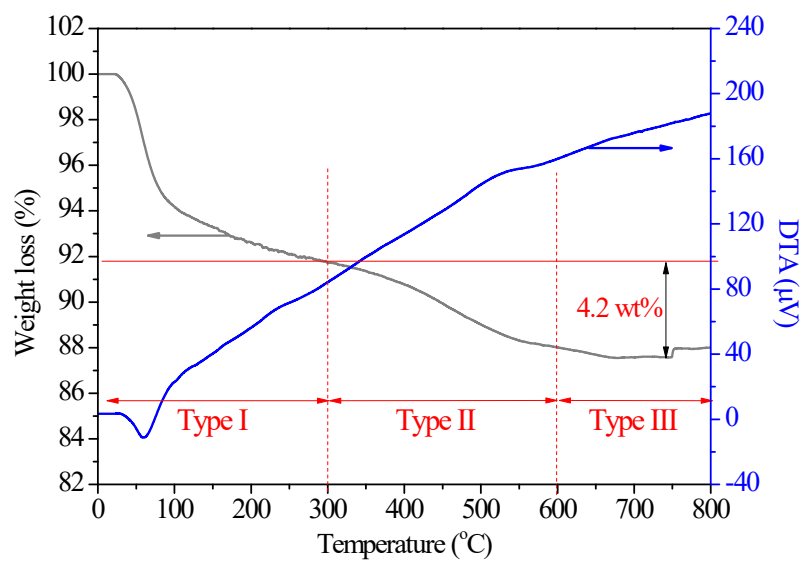

**Fig. S9.** TG analysis of the spent Zn<sub>0.02</sub>Zr<sub>0.02</sub>/Si-beta catalyst.

**Table S14.** Textural properties of fresh and spent catalysts of Zn<sub>0.02</sub>Zr<sub>0.02</sub>/Si-beta and Y-Zn<sub>0.02</sub>Zr<sub>0.02</sub>/Si-beta.

| Samples                                                | A <sub>BET</sub><br>(m <sup>2</sup> ·g <sup>-1</sup> ) <sup>a</sup> | V <sub>micro</sub><br>(cm <sup>3</sup> ·g <sup>-1</sup> ) <sup>b</sup> | V <sub>meso</sub><br>(cm <sup>3</sup> ·g <sup>-1</sup> ) <sup>c</sup> | V <sub>total</sub><br>(cm <sup>3</sup> ·g <sup>-1</sup> ) | D <sub>micro</sub><br>(nm) <sup>d</sup> | D <sub>meso</sub><br>(nm) <sup>e</sup> |
|--------------------------------------------------------|---------------------------------------------------------------------|------------------------------------------------------------------------|-----------------------------------------------------------------------|-----------------------------------------------------------|-----------------------------------------|----------------------------------------|
| Zn <sub>0.02</sub> Zr <sub>0.02</sub> /Si-beta-fresh   | 479                                                                 | 0.19                                                                   | 0.38                                                                  | 0.57                                                      | 0.65                                    | 3.16                                   |
| Zn <sub>0.02</sub> Zr <sub>0.02</sub> /Si-beta-spent   | 404                                                                 | 0.15                                                                   | 0.32                                                                  | 0.47                                                      | 0.66                                    | 3.19                                   |
| Y-Zn <sub>0.02</sub> Zr <sub>0.02</sub> /Si-beta-fresh | 465                                                                 | 0.18                                                                   | 0.36                                                                  | 0.54                                                      | 0.65                                    | 3.05                                   |
| Y-Zn <sub>0.02</sub> Zr <sub>0.02</sub> /Si-beta-spent | 353                                                                 | 0.12                                                                   | 0.29                                                                  | 0.41                                                      | 0.66                                    | 3.15                                   |

<sup>a</sup>BET surface area; <sup>b</sup>micropore volume calculated by t-plot method; <sup>c</sup>mesopore volume calculated by BJH method; <sup>d</sup>average diameter for micropores evaluated by HK method; <sup>e</sup>average diameter of mesopores evaluated by the BJH method.

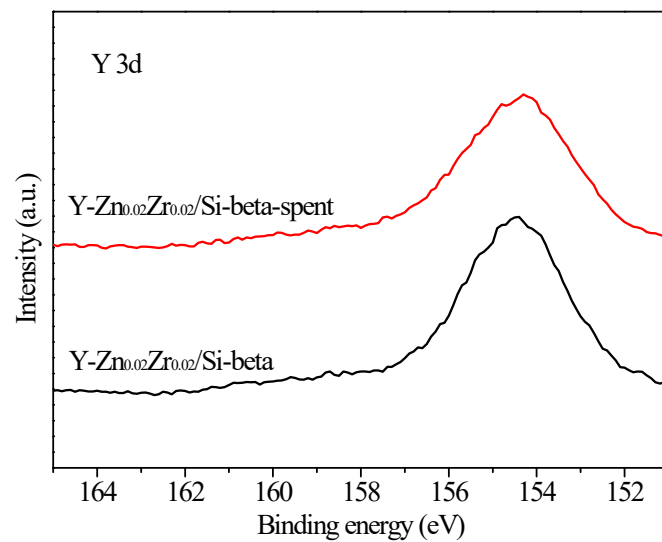

**Fig. S10.** Y 3d region for the Y-Zn<sub>0.02</sub>Zr<sub>0.02</sub>/Si-beta and Y-Zn<sub>0.02</sub>Zr<sub>0.02</sub>/Si-beta-spent catalysts.

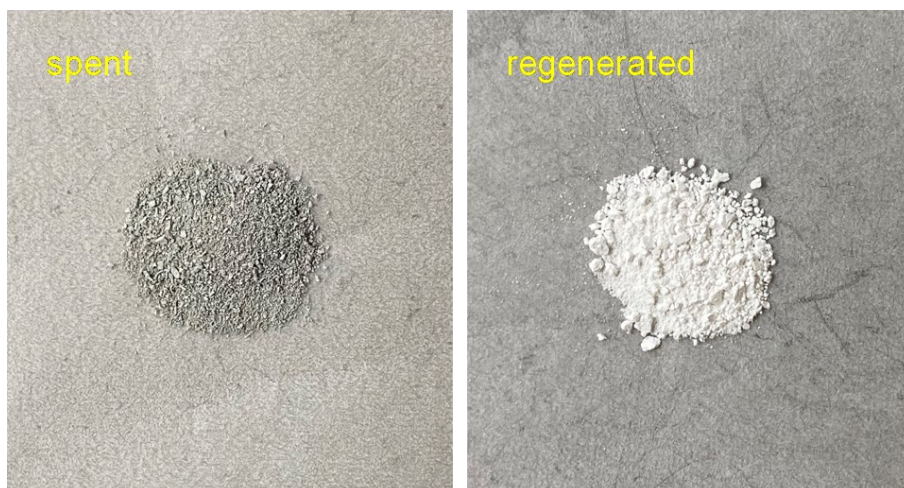

**Fig. S11.** Appearance images of the spent and regenerated Y-Zn<sub>0.02</sub>Zr<sub>0.02</sub>/Si-beta catalyst.

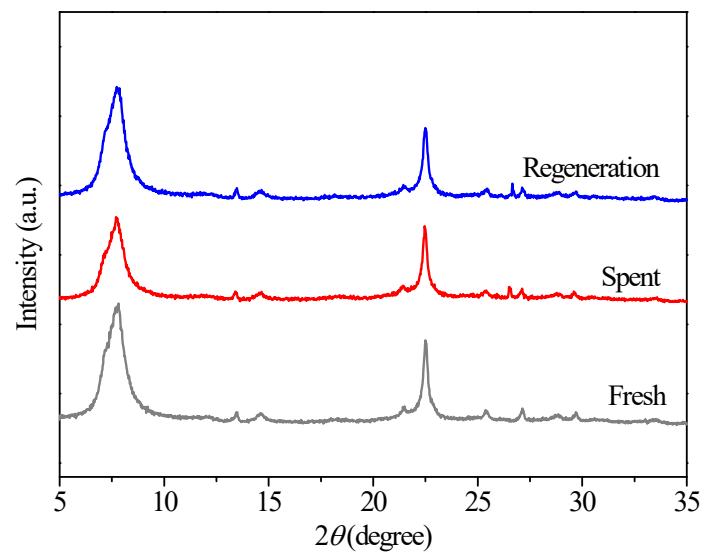

**Fig. S12.** XRD pattern of the fresh, spent, and regeneration catalysts of Y-Zn<sub>0.02</sub>Zr<sub>0.02</sub>/Si-beta.

**Table S15.** Textural properties of fresh, spent, and regeneration catalysts of Y-Zn<sub>0.02</sub>Zr<sub>0.02</sub>/Si-beta.

| Y-Zn <sub>0.02</sub> Zr <sub>0.02</sub> /Si-beta | A <sub>BET</sub><br>(m <sup>2</sup> ·g <sup>-1</sup> ) <sup>a</sup> | V <sub>micro</sub><br>(cm <sup>3</sup> ·g <sup>-1</sup> ) <sup>b</sup> | V <sub>meso</sub><br>(cm <sup>3</sup> ·g <sup>-1</sup> ) <sup>c</sup> | V <sub>total</sub><br>(cm <sup>3</sup> ·g <sup>-1</sup> ) |
|--------------------------------------------------|---------------------------------------------------------------------|------------------------------------------------------------------------|-----------------------------------------------------------------------|-----------------------------------------------------------|
| Fresh                                            | 465                                                                 | 0.18                                                                   | 0.36                                                                  | 0.54                                                      |
| Spent                                            | 353                                                                 | 0.12                                                                   | 0.29                                                                  | 0.41                                                      |
| Regeneration                                     | 461                                                                 | 0.16                                                                   | 0.35                                                                  | 0.51                                                      |

<sup>a</sup>BET surface area; <sup>b</sup>micropore volume calculated by t-plot method; <sup>c</sup>mesopore volume calculated by BJH method.

## References

- [1] Y. Han, S. S. Lee and J. Y. Ying, *Chem. Mater.* 2007, **19**, 2292-2298.
- [2] M. Choi, W. Heo, F. Kleitz and R. Ryoo, *Chem. Commun.* 2003, 1340-1341.
- [3] K. Soni, B. S. Rana, A. K. Sinha, A. Bhaumik, M. Nandi, M. Kumar and G. M. Dhar, *Appl. Catal. B: Environ.* 2009, **90**, 55-63.
- [4] O. V. Larina, P. I. Kyriienko, D. Y. Balakin, M. Vorokhta, I. Khalakhan, Y. M. Nychiporuk, V. Matolín, S. O. Solovieva and S. M. Orlyk, *Catal. Sci. Technol.* 2019, **9**, 3964-3978.
- [5] O. V. Larina, N. D. Shcherban, P. I. Kyriienko, I. M. Remezovskyi, P. S. Yaremov, I. Khalakhan, G. Mali, S. O. Solviev, S. M. Orlyk and S. Dzwigaj, *ACS Sustainable Chem. Eng.* 2020, **8**, 16600-16611.
- [6] P. I. Kyriienko, O. V. Larina, D. Y. Balakin, A. O. Stetsuk, Y. M. Nychiporuk, S. O. Soloviev and S. M. Orlyk, *Appl. Catal. A: Gen.* 2021, **616**, 118081.
- [7] V. Maurice, M. Salmeron and G. A. Somojai, *Surf. Sci.* 1990, **237**, 116.
- [8] Y. M. Wang, Y. S. Li, P. C. Wong and K. A. R. Michell, *Appl. Surf. Sci.* 1993, **72**, 237.
- [9] M. A. Gondal, T. A. Fasasi, Umair Baig and A. Mekki, *J. Nanosci. Nanotechnol.* 2018, **18**, 4030-4039.
- [10] S. Z. Khan, Y. D. Yuan, A. Abdolvand, M. Schmidt, P. Crouse and L. Li, *Journal of Nanopart. Res.* 2008, **11**, 1421.
- [11] P. A. W. van der Heide, *J. Electron Spectrosc.* 2006, **151**, 79-91.
